# Supplementary material for: Microbiological Evaluation of Water Used in Dental Units
Source: MDPI journal article supplement (doi:10.3390/w14060915), 2022-03-15
Supplement: s1 [file s1]

# Microbiological evaluation of water used in dental units

**Bartłomiej Błaszczyk<sup>1</sup>, Magdalena Pajczkowska<sup>3</sup>, Joanna Nowicka<sup>3</sup>, Maria Szymonowicz<sup>1</sup>, Wojciech Zakrzewski<sup>1</sup>, Adam Lubojański<sup>1</sup>, Marlena Hercuń-Jaskółka<sup>1</sup>, Aleksandra Synowiec<sup>1</sup>, Sebastian Fedorowicz<sup>3</sup>, Wojciech Dobrzyński<sup>4</sup>, Zbigniew Rybak<sup>1</sup>, Maciej Dobrzyński<sup>2</sup>**

<sup>1</sup> Pre-Clinical Research Centre, Wrocław Medical University, Bujwida 44, 50-345 Wrocław, Poland Bartłomiej.blaszczyk@student.umw.edu.pl (B.B); maria.szymonowicz@umw.edu.pl (M.S); wojciech.zakrzewski@student.umw.edu.pl (W.Z.); Adam.lubojanski@student.umw.edu.pl (A.L.); Marlena.hercun-jaskolka@student.umw.edu.pl (M.H-J); Aleksandra.synowiec@student.umw.edu.pl (A.S); Zbigniew.rybak@umw.edu.pl (Z.R)

<sup>2</sup> Department of Pediatric Dentistry and Preclinical Dentistry, Wrocław Medical University, Krakowska 26, 50-425 Wrocław, Poland; maciej.dobrzynski@umw.edu.pl (M.D.)

<sup>3</sup> Department of Microbiology, Wrocław Medical University, ul. Chalubinskiego 4, 50-368 Wrocław, Poland; Magdalena.pajczkowska@umw.edu.pl (M.P); joanna.nowicka@umw.edu.pl (J.N); Sebastian.fedorowicz@student.umw.edu.pl (S.F)

<sup>4</sup> Student Scientific Circle at the Department of Dental Materials, School of Medicine with the Division of Dentistry in Zabrze, Medical University of Silesia in Katowice, Akademicki Square 17, 41-902 Bytom, Poland; wojt.dobrzynski@wp.pl (W.D)

Correspondence: wojciech.zakrzewski@student.umw.edu.pl (W.Z.); maciej.dobrzynski@umw.edu.pl (M.D.); Tel.: +48-51-3182-744 (W.Z.); +48-71-7840-378 (M.D.)

**Table S1.** Microorganisms isolated from individual dental unit component parts and the water supplying these systems, and CFU/ml.

| unit no.          | air syringe socket   | micromotor socket      | turbine socket | scaler socket at the dental chair | bottle under the dental chair – [CFU/ml] | bottle under the dental chair              | cup water – [CFU/ml]                                                       | water cup tap –                             | main bucket – [CFU/ml]                | water container in the Room – [CFU/ml] |
|-------------------|----------------------|------------------------|----------------|-----------------------------------|------------------------------------------|--------------------------------------------|----------------------------------------------------------------------------|---------------------------------------------|---------------------------------------|----------------------------------------|
|                   | 2                    | 3                      | 4              | 5                                 | 6                                        | 7                                          | 8                                                                          | 9                                           | 10                                    | 11                                     |
| Surgical category |                      |                        |                |                                   |                                          |                                            |                                                                            |                                             |                                       |                                        |
| 1                 | <i>M. phyllospha</i> | <i>L. shinshuensis</i> |                |                                   | <i>M. ginsengisoli</i> 1x10 <sup>2</sup> | <i>S. capitis</i><br><i>S. epidermidis</i> | <i>S. cohnii</i> 2.7x10 <sup>3</sup><br><i>C. avidum</i> 4x10 <sup>2</sup> | <i>S. epidermidis</i><br><i>A. ursingii</i> | None because water is ordered from an | <i>S. warneri</i> 8.5x10 <sup>3</sup>  |

|   |                                                                                             |                                                                                                                                            |            |           |                                                                                                                                                                                                                                                       |                                                                                                                                                                |                                                                                                                                                                         |                                   |                                                      |  |
|---|---------------------------------------------------------------------------------------------|--------------------------------------------------------------------------------------------------------------------------------------------|------------|-----------|-------------------------------------------------------------------------------------------------------------------------------------------------------------------------------------------------------------------------------------------------------|----------------------------------------------------------------------------------------------------------------------------------------------------------------|-------------------------------------------------------------------------------------------------------------------------------------------------------------------------|-----------------------------------|------------------------------------------------------|--|
|   | <i>erae</i><br><i>S.cohnii</i><br><i>L. shinshuen</i><br><i>sis</i>                         | <i>is</i><br><i>S. haemolyticus</i><br><i>Brevundimonas spp.</i><br><i>S. xylosus</i><br><i>S. epidermidis</i><br><i>Cladosporium spp.</i> |            |           | <i>R. pickettii</i> 1.8x10 <sup>3</sup><br><i>C. metallidurans</i> 2.8x10 <sup>3</sup><br><i>M. luteus</i> 2.3x10 <sup>2</sup><br><i>Cladosporium spp.</i> 1x10 <sup>2</sup><br><i>Alternaria spp.</i> 1x10 <sup>2</sup>                              | <i>Cladosporium spp.</i>                                                                                                                                       | <i>C. novyi</i> 3.8x10 <sup>3</sup><br><i>A. dentalis</i> 2.0x10 <sup>2</sup>                                                                                           | <i>B. casei</i><br><i>S. cohi</i> | outside source                                       |  |
| 2 | <i>M. ginsengisoli</i> <i>S. warneri</i> <i>S. epidermidis</i>                              | <i>L. shinshuensis</i> <i>S. epidermidis</i> <i>S. hominis</i> <i>M. luteus</i>                                                            |            |           | <i>B. aurantiaca</i> 0.5x10 <sup>2</sup> <i>S. warneri</i> 4x10 <sup>2</sup><br><i>M. luteus</i> 7x10 <sup>3</sup><br><i>S. pasteurii</i> 1.35x10 <sup>4</sup><br><i>Cladosporium spp.</i> 1x10 <sup>1</sup><br><i>F. oxysporum</i> 1x10 <sup>1</sup> | <i>S. warneri</i> ,<br><i>B. celere</i><br><i>P. putida</i> ,<br><i>B. fragilis</i> ,<br><i>M. testaceum</i><br><i>C. metallidurans</i><br><i>F. oxysporum</i> | <i>S. pasteurii</i> 3.5x10 <sup>2</sup><br><i>S. epidermidis</i> 1x10 <sup>1</sup><br><i>B. diminuta</i> 2x10 <sup>1</sup><br><i>Penicillium spp.</i> 1x10 <sup>2</sup> |                                   | None because water is ordered from an outside source |  |
| 3 | <i>S. epidermidis</i><br><i>S. warneri</i><br><i>E. faecalis</i><br><i>Penicillium spp.</i> | <i>E. faecalis</i>                                                                                                                         | No turbine | No scaler | <i>R. pickettii</i> 3.5x10 <sup>2</sup><br><i>Cladosporium spp.</i> 0.1x10 <sup>2</sup>                                                                                                                                                               |                                                                                                                                                                |                                                                                                                                                                         |                                   | None because water is ordered from an outside source |  |
| 4 | <i>M. ginsengisoli</i> <i>S. haemolyticus</i> <i>S.</i>                                     | <i>S. warneri</i> <i>S. epidermidis</i>                                                                                                    | No turbine | No scaler | <i>L. shinshuensis</i> 4x10 <sup>2</sup><br><i>S. warneri</i> 0.9x10 <sup>2</sup><br><i>S. maltophilia</i> 2x10 <sup>2</sup>                                                                                                                          | <i>S. capitis</i><br><i>F. oxysporum</i>                                                                                                                       | <i>S. pasteurii</i> 3.4x10 <sup>3</sup><br><i>S. warneri</i> 2.7x10 <sup>3</sup>                                                                                        | <i>S. capitis</i>                 | None because water is ordered from an outside source |  |

|   |                                                                                                                    |                                                                                                                                                              |            |           |                                                                                                                                                                                                                                                                                                                                                                                                                                                                                                                                  |                                                                                                                                                                            |                                      |                        |                                                      |
|---|--------------------------------------------------------------------------------------------------------------------|--------------------------------------------------------------------------------------------------------------------------------------------------------------|------------|-----------|----------------------------------------------------------------------------------------------------------------------------------------------------------------------------------------------------------------------------------------------------------------------------------------------------------------------------------------------------------------------------------------------------------------------------------------------------------------------------------------------------------------------------------|----------------------------------------------------------------------------------------------------------------------------------------------------------------------------|--------------------------------------|------------------------|------------------------------------------------------|
|   | <i>hominis</i><br><i>S. warneri</i> ,                                                                              |                                                                                                                                                              |            |           | <i>Cladosporium spp.</i><br>2x10 <sup>1</sup><br><i>F. oxysporum</i><br>1x10 <sup>1</sup>                                                                                                                                                                                                                                                                                                                                                                                                                                        |                                                                                                                                                                            |                                      |                        |                                                      |
| 5 | <i>L. shinshuen</i><br><i>sis S. aureus</i>                                                                        | <i>B. pumilus</i><br><i>S. warneri</i><br><i>Alternaria spp.</i>                                                                                             |            |           | <i>S. pasteurii</i> 2.4x10 <sup>2</sup><br><i>S. oralis</i> 3x10 <sup>2</sup><br><i>S. parasanguinis</i> 5x10 <sup>2</sup><br><i>S. warneri</i> 2.9x10 <sup>2</sup><br><i>E. coli</i> 3.2x10 <sup>2</sup><br><i>Cladosporium spp.</i> 1x10 <sup>1</sup>                                                                                                                                                                                                                                                                          | <i>S. warneri</i>                                                                                                                                                          |                                      | <i>E. coli</i>         | None because water is ordered from an outside source |
| 6 | <i>S. pasteurii</i><br><i>S. haemolyticus</i><br><i>S. warneri</i><br><i>S. epidermidis</i><br><i>F. oxysporum</i> | <i>S. sanguinis</i><br><i>S. warneri</i><br><i>M. ginsengisol</i><br><i>i S. oralis</i><br><i>R. pickettii</i><br><i>S. auerus</i><br><i>Alternaria spp.</i> | No turbine | No scaler | <i>S. epidermidis</i> 4.3x10 <sup>2</sup><br><i>R. pickettii</i> 1.3x10 <sup>3</sup><br><i>P. oxydans</i> 2.4x10 <sup>2</sup><br><i>A. toluolicum</i> 1.7x10 <sup>2</sup><br><i>B. cepacia</i> 4.5x10 <sup>2</sup><br><i>L. paracasei</i> 2.01x10 <sup>3</sup><br><i>M. testaceum</i> 4x10 <sup>1</sup><br><i>B. aurantiaca</i> 1.1x10 <sup>2</sup><br><i>S. warneri</i> 3x10 <sup>3</sup><br><i>C. pauculus</i> 8x10 <sup>1</sup><br><i>Cladosporium spp.</i> 3x10 <sup>1</sup><br><i>Rhodotorula spp.</i> 1.99x10 <sup>4</sup> | <i>A. oris</i><br><i>S. sanguinis</i> <i>S. epidermidis</i> <i>S. salivarius</i><br><i>S. capitis</i><br><i>L. shinshuensis</i> <i>S. warneri</i><br><i>S. maltophilia</i> |                                      | <i>S. warneri</i>      | None because water is ordered from an outside source |
| 7 | <i>S. cohnii</i><br><i>B. cepacia</i><br><i>S.</i>                                                                 | <i>R. pickettii</i><br><i>M. ginsengisol</i>                                                                                                                 | No turbine | No scaler | <i>S. warneri</i> 1.08x10 <sup>2</sup><br><i>M. testaceum</i>                                                                                                                                                                                                                                                                                                                                                                                                                                                                    | <i>S. capitis</i><br><i>K. palustris</i><br><i>S. epidermidis</i>                                                                                                          | <i>S. cohnii</i> 2.7x10 <sup>2</sup> | <i>S. haemolyticus</i> | None because water is ordered from an outside source |

|                       |                                                                                                                                        |                                                                                                                 |                                                                |                                                                      |                                                                                                                                                                             |                                                                                                     |                                                                                                                                                                                                                        |                                                                                             |                                                                                      |  |
|-----------------------|----------------------------------------------------------------------------------------------------------------------------------------|-----------------------------------------------------------------------------------------------------------------|----------------------------------------------------------------|----------------------------------------------------------------------|-----------------------------------------------------------------------------------------------------------------------------------------------------------------------------|-----------------------------------------------------------------------------------------------------|------------------------------------------------------------------------------------------------------------------------------------------------------------------------------------------------------------------------|---------------------------------------------------------------------------------------------|--------------------------------------------------------------------------------------|--|
|                       | <i>epidermidis</i><br><i>S. hominis</i>                                                                                                | <i>i</i>                                                                                                        |                                                                |                                                                      | 1.2x10 <sup>2</sup><br><i>R. pickettii</i> 1.4x10 <sup>3</sup><br><i>B. diminuta</i><br>1.2x10 <sup>2</sup><br><i>Cladosporium</i> spp.<br>1x10 <sup>2</sup>                | <i>B. mycoides</i><br><i>B. weihenstephanensis</i>                                                  |                                                                                                                                                                                                                        |                                                                                             |                                                                                      |  |
| 8                     | <i>S. warneri</i> ,                                                                                                                    | <i>S. warneri</i> ,<br><i>M. ginsengisoli</i><br><i>A. ursingii</i><br><i>S. epidermidis</i><br><i>A. niger</i> | No turbine                                                     |                                                                      | <i>M. esteraromaticum</i><br>2.2x10 <sup>2</sup>                                                                                                                            |                                                                                                     | <i>B. mycoides</i> 1.1x10 <sup>3</sup><br><i>L. shinshuensis</i> 4.2x10 <sup>3</sup><br><i>C. metallidurans</i> 6.4x10 <sup>3</sup><br><i>K. palustris</i> 4.1 x10 <sup>2</sup><br><i>S. warneri</i> 1x10 <sup>2</sup> | <i>S. epidermidis</i>                                                                       | None because water is ordered from an outside source                                 |  |
| 9                     | <i>B. cepacia</i><br><i>B. cereus</i>                                                                                                  | <i>S. epidermidis</i><br><i>L. shinshuensis</i><br><i>F. oxysporum</i>                                          | <i>P. fungorum</i><br><i>L. shinshuensis</i>                   | No scaler                                                            | <i>S. epidermidis</i><br>1.1x10 <sup>2</sup><br><i>C. metallidurans</i><br>2x10 <sup>2</sup>                                                                                | <i>B. cereus</i><br><i>B. casei</i><br><i>S. warneri</i> <i>S. epidermidis</i><br><i>M. morgani</i> |                                                                                                                                                                                                                        | <i>Rothia dentocariosa</i><br><i>Staphylococcus warneri</i><br><i>Staphylococcus cohnii</i> | None because water is ordered from an outside source                                 |  |
| Conservative category |                                                                                                                                        |                                                                                                                 |                                                                |                                                                      |                                                                                                                                                                             |                                                                                                     |                                                                                                                                                                                                                        |                                                                                             |                                                                                      |  |
| 1                     | <i>S. capitis</i><br><i>B. cepacia</i><br><i>S. epidermidis</i><br><i>S. maltophilia</i><br><i>P. putida</i><br><i>Alternaria</i> spp. | <i>B. cepacia</i><br><i>S. epidermidis</i>                                                                      | <i>B. simplex</i><br><i>S. epidermidis</i><br><i>P. putida</i> | <i>S. haemolyticus</i><br><i>B. cepacia</i><br><i>S. epidermidis</i> | <i>S. maltophilia</i><br>2.6x10 <sup>2</sup><br><i>S. aureus</i> 2x10 <sup>2</sup><br><i>C. metallidurans</i><br>1.3x10 <sup>3</sup><br><i>B. cepacia</i> 6x10 <sup>2</sup> | <i>S. maltophilia</i><br><i>S. capitis</i><br><i>A. ursingii</i><br><i>Alternaria</i> spp.          |                                                                                                                                                                                                                        | <i>Bacillus megaterium</i><br><i>Micrococcus luteus</i>                                     | <i>R. pickettii</i> 4.3x10 <sup>4</sup><br><i>S. epidermidis</i> 1.2x10 <sup>3</sup> |  |
| 2                     | <i>S. aureus</i>                                                                                                                       | <i>S.</i>                                                                                                       | <i>B. cepacia</i>                                              | <i>B.</i>                                                            | <i>B. cepacia</i> 1.3x10 <sup>3</sup>                                                                                                                                       | <i>B. cepacia</i> <i>S.</i>                                                                         | <i>S. epidermidis</i> 2x10 <sup>2</sup>                                                                                                                                                                                |                                                                                             | <i>R. pickettii</i> 4.3x10 <sup>4</sup>                                              |  |

|                                    |                                  |                                         |                        |                   |                |                                                                                                                   |                                                                               |                                                                                     |                                                                                      |                                                                                                       |                                                                                                      |                                        |
|------------------------------------|----------------------------------|-----------------------------------------|------------------------|-------------------|----------------|-------------------------------------------------------------------------------------------------------------------|-------------------------------------------------------------------------------|-------------------------------------------------------------------------------------|--------------------------------------------------------------------------------------|-------------------------------------------------------------------------------------------------------|------------------------------------------------------------------------------------------------------|----------------------------------------|
|                                    | <i>Alternaria</i><br><i>spp.</i> | <i>epidermidis</i><br><i>B. cepacia</i> |                        | <i>pyrrocinia</i> |                | <i>epidermidis</i><br><i>B. muralis</i><br><i>B. simplex</i><br><i>Pseudarthrobacer</i><br><i>polychromogenes</i> | <i>B. simplex</i> 1.2x10 <sup>3</sup><br><i>S. aureus</i> 4.6x10 <sup>2</sup> |                                                                                     | <i>S. epidermidis</i> 1.2x10 <sup>3</sup>                                            |                                                                                                       |                                                                                                      |                                        |
| 3                                  |                                  |                                         |                        |                   |                |                                                                                                                   |                                                                               |                                                                                     | <i>R. pickettii</i> 4.3x10 <sup>4</sup><br><i>S. epidermidis</i> 1.2x10 <sup>3</sup> |                                                                                                       |                                                                                                      |                                        |
| 4                                  |                                  |                                         |                        |                   |                |                                                                                                                   |                                                                               |                                                                                     | <i>R. pickettii</i> 4.3x10 <sup>4</sup><br><i>S. epidermidis</i> 1.2x10 <sup>3</sup> |                                                                                                       |                                                                                                      |                                        |
| unit no.                           |                                  |                                         | air syringe socket     | micromotor socket | turbine socket | scaler socket at the dental chair                                                                                 | bottle under the dental chair – [CFU/ml]                                      | bottle under the dental chair                                                       | cup water – [CFU/ml]                                                                 | water cup tap –                                                                                       | main bucket – [CFU/ml]                                                                               | water container in the Room – [CFU/ml] |
|                                    |                                  |                                         | 2                      | 3                 | 4              | 5                                                                                                                 | 6                                                                             | 7                                                                                   | 8                                                                                    | 9                                                                                                     | 10                                                                                                   | 11                                     |
| Conservative category – room no. 2 |                                  |                                         |                        |                   |                |                                                                                                                   |                                                                               |                                                                                     |                                                                                      |                                                                                                       |                                                                                                      |                                        |
| 1                                  |                                  |                                         | <i>S. haemolyticus</i> |                   |                | No scaler                                                                                                         | <i>L. shinshuensis</i> 3x10 <sup>2</sup>                                      | <i>S. epidermidis</i> <i>S. paucimobilis</i> <i>R. picketti</i> <i>S. warneri</i> , | <i>S. epidermidis</i> 7.1x10 <sup>3</sup>                                            | <i>Staphylococcus haemolyticus</i> <i>Staphylococcus aureus</i> <i>Microbacterium esteraromaticum</i> | <i>Ralstonia pickettii</i> 4.3x10 <sup>4</sup> <i>Staphylococcus epidermidis</i> 1.2x10 <sup>3</sup> | <i>Arthrobacter russicus</i>           |

|                                |                                             |                        |                                                  |                                                                         |                                                                                      |                                                                                                                                |                                                                                                                                                                                     |                                                                |                                                                                           |  |
|--------------------------------|---------------------------------------------|------------------------|--------------------------------------------------|-------------------------------------------------------------------------|--------------------------------------------------------------------------------------|--------------------------------------------------------------------------------------------------------------------------------|-------------------------------------------------------------------------------------------------------------------------------------------------------------------------------------|----------------------------------------------------------------|-------------------------------------------------------------------------------------------|--|
|                                |                                             |                        |                                                  |                                                                         |                                                                                      |                                                                                                                                |                                                                                                                                                                                     | <i>Staphylococcus haemolyticus</i>                             |                                                                                           |  |
| 2                              |                                             | <i>L. shinshuensis</i> | <i>S. epidermidis</i>                            | <i>S. haemolyticus</i><br><i>M. phyllosphaerae</i><br><i>S. warneri</i> | <i>S. warneri</i><br>1x10 <sup>2</sup><br><i>S. epidermidis</i><br>1x10 <sup>2</sup> | <i>S. warneri</i> ,<br><i>S. hominis</i><br><i>Alternaria</i> spp.<br><i>F. oxysporum</i>                                      | <i>S. epidermidis</i><br>1.02x10 <sup>4</sup><br><i>B. pumilus</i><br>2.08x10 <sup>4</sup>                                                                                          | <i>S. haemolyticus</i>                                         |                                                                                           |  |
| 3                              | <i>S. aureus</i><br><i>C. metallidurans</i> | <i>B. cepacia</i>      |                                                  | <i>K. palustris</i><br><i>S. epidermidis</i>                            |                                                                                      | <i>B. cepacia</i><br><i>L. shinshuensis</i><br><i>Fusarium</i> spp.<br><i>F. oxysporum</i>                                     | <i>S. epidermidis</i><br>2x10 <sup>2</sup><br><i>M. luteus</i><br>2.6x10 <sup>4</sup>                                                                                               | <i>S. warneri</i> ,                                            |                                                                                           |  |
| 4                              |                                             |                        | <i>L. shinshuensis</i><br><i>S. haemolyticus</i> | <i>Alternaria</i> spp.                                                  | <i>R. picketti</i><br>1.0x10 <sup>3</sup>                                            | <i>S. epidermidis</i>                                                                                                          | <i>S. epidermidis</i><br>1.14x10 <sup>4</sup><br><i>S. haemolyticus</i><br>2.4x10 <sup>2</sup><br><i>K. kristinae</i><br>1x10 <sup>2</sup><br><i>R. amarae</i><br>1x10 <sup>2</sup> | <i>S. warneri</i> <i>S. epidermidis</i><br><i>K. kristinae</i> |                                                                                           |  |
| Conservative category – 3 room |                                             |                        |                                                  |                                                                         |                                                                                      |                                                                                                                                |                                                                                                                                                                                     |                                                                |                                                                                           |  |
| 1                              |                                             | <i>R. picketti</i>     |                                                  |                                                                         | <i>A. lwoffii</i><br>3x10 <sup>2</sup>                                               | <i>C. matellidurans</i><br><i>F. oxysporum</i><br><i>Alternaria</i> spp.<br><i>Cladosporium</i> spp.<br><i>Penicilium</i> spp. | <i>S. epidermidis</i><br>6.1x10 <sup>3</sup>                                                                                                                                        |                                                                | <i>R. picketti</i><br>4.3x10 <sup>4</sup><br><i>S. epidermidis</i><br>1.2x10 <sup>3</sup> |  |
| 2                              | <i>M. luteus</i>                            |                        | No micromotor                                    | No scaler                                                               | <i>M. luteus</i><br>2.2x10 <sup>3</sup>                                              | <i>Bacillus cereus</i><br><i>Alternaria</i> spp.<br><i>F. oxysporum</i>                                                        | <i>B. pumilus</i><br>3.00x10 <sup>4</sup>                                                                                                                                           | <i>Novosphingobium resinovorum</i>                             |                                                                                           |  |

|                                |                                          |                                              |                       |                     |                                                                                                                                                                                       |                                                                                                                                              |                                                                                                                                                       |                   |                                                                                        |                                                                                                           |
|--------------------------------|------------------------------------------|----------------------------------------------|-----------------------|---------------------|---------------------------------------------------------------------------------------------------------------------------------------------------------------------------------------|----------------------------------------------------------------------------------------------------------------------------------------------|-------------------------------------------------------------------------------------------------------------------------------------------------------|-------------------|----------------------------------------------------------------------------------------|-----------------------------------------------------------------------------------------------------------|
| 3                              |                                          | <i>C. matellidurans</i>                      |                       | No scaler           | <i>S. warneri</i><br>1.0x10 <sup>2</sup><br><i>B. pumilus</i><br>2.9x10 <sup>2</sup>                                                                                                  | <i>Alternaria</i> spp.<br><i>F. oxysporum</i>                                                                                                | <i>Lysinibacillus boronitolerans</i> 9x10 <sup>1</sup><br><i>R. amarae</i><br>1.2x10 <sup>2</sup><br><i>Candida parapsilosis</i><br>1x10 <sup>2</sup> |                   |                                                                                        |                                                                                                           |
| 4                              |                                          | <i>C. matellidurans</i>                      |                       | No scaler           | <i>R. picketti</i><br>3.3x10 <sup>3</sup><br><i>S. warneri</i><br>1.6x10 <sup>3</sup><br><i>S. haemolyticus</i> 1.6x10 <sup>3</sup><br><i>C. matellidurans</i><br>1.9x10 <sup>3</sup> | <i>S. aureus</i><br><i>Alternaria</i> spp.<br><i>F. oxysporum</i>                                                                            | <i>R. amarae</i><br>7.6x10 <sup>3</sup>                                                                                                               | <i>S. warneri</i> |                                                                                        |                                                                                                           |
| 5                              | <i>S. capitis</i><br><i>S. warneri</i> , |                                              |                       | No scaler           | <i>M. luteus</i><br>1.2x10 <sup>3</sup><br><i>B. cepacia</i><br>1.4x10 <sup>3</sup>                                                                                                   | <i>L. shinshuensis</i><br><i>S. epidermidis</i><br><i>Alternaria</i> spp.<br><i>F. oxysporum</i>                                             |                                                                                                                                                       | <i>B. cereus</i>  |                                                                                        |                                                                                                           |
| Conservative category – 4 room |                                          |                                              |                       |                     |                                                                                                                                                                                       |                                                                                                                                              |                                                                                                                                                       |                   |                                                                                        |                                                                                                           |
| 1                              | <i>F. oxysporum</i>                      | <i>S. warneri</i><br><i>C. matellidurans</i> | <i>S. epidermidis</i> | <i>F. oxysporum</i> | <i>B. pumilus</i><br>2.13x10 <sup>4</sup>                                                                                                                                             | <i>S. sanguinis</i><br><i>S. xylosus</i><br><i>S. maltophilia</i><br><i>S. shinshuensis</i><br><i>S. haemolyticus</i><br><i>F. oxysporum</i> | <i>M. luteus</i><br>8.8x10 <sup>3</sup>                                                                                                               |                   | <i>Ralstonia pickettii</i><br>4.3x10 <sup>4</sup><br><i>Staphylococcus epidermidis</i> | <i>Raistonia picketti</i><br>4.7x10 <sup>3</sup><br><i>Staphylococcus aureus</i><br>1.09 x10 <sup>3</sup> |
| 2                              |                                          | <i>F. oxysporum</i>                          |                       | No scaler           | <i>C. pauculus</i>                                                                                                                                                                    |                                                                                                                                              | <i>M. luteus</i><br>2.1x10 <sup>3</sup>                                                                                                               |                   |                                                                                        |                                                                                                           |

|                        |                       |                              |                          |                                      |                                                                                                                    |                                  |                                                                                                                       |                                           |                                                                        |                                              |
|------------------------|-----------------------|------------------------------|--------------------------|--------------------------------------|--------------------------------------------------------------------------------------------------------------------|----------------------------------|-----------------------------------------------------------------------------------------------------------------------|-------------------------------------------|------------------------------------------------------------------------|----------------------------------------------|
|                        |                       |                              |                          |                                      | 3.8x10 <sup>4</sup>                                                                                                |                                  | C. pauculus<br>1.4x10 <sup>4</sup>                                                                                    |                                           | s 1.2x10 <sup>3</sup>                                                  |                                              |
| 3                      | S. xylosus            |                              |                          | No scaler                            | C. parapsilosis<br>4x10 <sup>1</sup>                                                                               | M. luteus                        | S. epidermidis<br>2.2x10 <sup>3</sup><br>S. capitis<br>9.2x10 <sup>3</sup><br>B. diminuta<br>4.7x10 <sup>3</sup>      | Staphylococcus xylosus                    |                                                                        |                                              |
| 4                      |                       | B. cepacia<br>S. epidermidis | B. cepacia<br>S. hominis | No scaler                            | R. pickettii<br>6.46x10 <sup>4</sup><br>R. amarae<br>5.01x10 <sup>2</sup><br>S. epidermidis<br>3.5x10 <sup>3</sup> | Alternaria spp.                  | S. pasteurii<br>1.12x10 <sup>4</sup><br>A. citratiphilum<br>6.46x10 <sup>4</sup><br>B. pumilus<br>7.6x10 <sup>3</sup> | S. warneri                                |                                                                        |                                              |
| room no. /<br>unit no. | air syringe<br>socket | micromotor<br>socket         | turbine socket           | scaler socket at<br>the dental chair | bottle under the<br>dental chair –<br>[CFU/ml]                                                                     | bottle under the<br>dental chair | cup water –<br>[CFU/ml]                                                                                               | water cup<br>tap –                        | main bucket<br>–<br>[CFU/ml]                                           | water container in the<br>Room –<br>[CFU/ml] |
|                        | 2                     | 3                            | 4                        | 5                                    | 6                                                                                                                  | 7                                | 8                                                                                                                     | 9                                         | 10                                                                     | 11                                           |
| periodontal category   |                       |                              |                          |                                      |                                                                                                                    |                                  |                                                                                                                       |                                           |                                                                        |                                              |
| 1                      |                       |                              |                          |                                      |                                                                                                                    | F. oxysporum                     |                                                                                                                       | R. pickettii<br>4.3x10 <sup>4</sup><br>S. | S. epidermidis 1.2x10 <sup>4</sup><br>R. pickettii 2.9x10 <sup>3</sup> |                                              |



|                                   |                                                                     |                                    |                                         |                                             |                                                                                  |                                                                         |                                      |                                                                         |                                                                                        |                                                                                   |
|-----------------------------------|---------------------------------------------------------------------|------------------------------------|-----------------------------------------|---------------------------------------------|----------------------------------------------------------------------------------|-------------------------------------------------------------------------|--------------------------------------|-------------------------------------------------------------------------|----------------------------------------------------------------------------------------|-----------------------------------------------------------------------------------|
| 2                                 | <i>C. metallidurans</i><br><i>S. warneri</i>                        | <i>Cladosporium</i> spp.           |                                         | <i>M. luteus</i><br><i>C. metallidurans</i> |                                                                                  | <i>S. epidermidis</i><br><i>S. maltophila</i><br><i>Alternaria</i> spp. | <i>B. simplex</i><br>$6 \times 10^2$ | <i>Staphylococcus epidermidis</i><br><i>Bacillus weihenstephanensis</i> | <i>epidermidis</i><br>$1.2 \times 10^3$                                                |                                                                                   |
| 3                                 | <i>S. warneri</i><br><i>B. cepacia</i>                              |                                    |                                         |                                             |                                                                                  |                                                                         |                                      |                                                                         |                                                                                        |                                                                                   |
| Periodontal category – room no. 2 |                                                                     |                                    |                                         |                                             |                                                                                  |                                                                         |                                      |                                                                         |                                                                                        |                                                                                   |
| 1                                 | <i>Alternaria</i> spp.                                              |                                    | <i>S. epidermidis</i>                   | <i>B. megaterium</i>                        | <i>S. succinus</i><br>$1 \times 10^2$<br><i>Penicillium</i> spp. $1 \times 10^1$ | <i>S. maltophila</i><br><i>L. coleohominis</i><br><i>B. muralis</i>     |                                      |                                                                         | <i>R. pickettii</i><br>$4.3 \times 10^4$<br><i>S. epidermidis</i><br>$1.2 \times 10^3$ | <i>S. epidermidis</i> $2.34 \times 10^3$<br><i>R. pickettii</i> $5.4 \times 10^3$ |
| 2                                 | <i>Cladosporium</i> spp.<br><i>Fusarium</i> spp.<br><i>A. niger</i> |                                    |                                         | <i>B. muralis</i>                           |                                                                                  | <i>S. maltophila</i>                                                    |                                      |                                                                         |                                                                                        |                                                                                   |
| 3                                 |                                                                     | Micromotor without water – no swab | <i>B. mycoides</i><br><i>B. cepacia</i> | <i>B. cepacia</i><br><i>R. pickettii</i>    | <i>S. epidermidis</i><br>$0.5 \times 10^2$                                       |                                                                         |                                      | <i>P. xanthomarina</i><br><i>Paenibacillus</i> spp.                     |                                                                                        |                                                                                   |

|   |                                                         |  |                                                                      |                                                 |                                                                                               |                                                                                                             |                                                            |                                                                                         |  |  |
|---|---------------------------------------------------------|--|----------------------------------------------------------------------|-------------------------------------------------|-----------------------------------------------------------------------------------------------|-------------------------------------------------------------------------------------------------------------|------------------------------------------------------------|-----------------------------------------------------------------------------------------|--|--|
| 4 | S.<br><i>epidermidis</i>                                |  | C.<br><i>metallidurans</i> B.<br><i>pumilus</i><br>B. <i>cepacia</i> | S.<br><i>pasteuri</i><br><i>Alternaria</i> spp. | S.<br><i>epidermidis</i><br>2.9x10 <sup>4</sup><br>S. <i>pasteuri</i><br>1.64x10 <sup>4</sup> |                                                                                                             |                                                            | Pseudarthrob<br>acer<br>polychromoge<br>nes<br>B.<br>weihenstepha<br>nensis<br>A. niger |  |  |
| 5 | S. <i>pasteuri</i><br><i>Peniciliu</i><br><i>m</i> spp. |  | S. <i>warneri</i>                                                    |                                                 | P. <i>septica</i><br>2.1x10 <sup>2</sup><br><i>Alternaria</i><br>spp.<br>3.4x10 <sup>2</sup>  | S.<br><i>maltophil</i><br><i>a</i> S.<br><i>epidermid</i><br><i>is</i><br><i>Peniciliu</i><br><i>m</i> spp. | B.<br><i>simpl</i><br><i>ex</i><br>4.6x1<br>0 <sup>2</sup> | P. <i>septica</i>                                                                       |  |  |
